# Supplementary material
Source: ML conference proceedings conference paper supplement (https://openaccess.thecvf.com/content/cvpr_2016/html/Dar_Temporal_Epipolar_Regions_2016_CVPR_paper.html)
Supplement: Supplementary file 1 [file Dar_Temporal_Epipolar_Regions_2016_CVPR_supplemental.zip]

Archive with 23 entries (20 files):
- Code/
- Code/GUI_Code/
- Code/GUI_Code/orderImages.fig
- Code/GUI_Code/orderImages.m
- Code/GUI_Code/selectInitCorr.fig
- Code/GUI_Code/selectInitCorr.m
- Code/loadAndOrderImFromDir.m
- Code/Main_App/
- Code/Main_App/calcEpiLine.m
- Code/Main_App/calcIntersectAndParallels.m
- Code/Main_App/calcRegions.m
- Code/Main_App/calculateTERs.m
- Code/Main_App/displayResults.m
- Code/Main_App/getImagesInDir.m
- Code/Main_App/getRelevantIntersections.m
- Code/Main_App/lookUpInvalidTERs.m
- Code/Main_App/PolySetFun.m
- Code/Main_App/readImages.m
- Code/Main_App/sortPointsCW.m
- Code/README.txt
- Code/runTERs.m
- README.txt
- SupplementaryMaterial.pdf
