# Supplementary material
Source: ML conference proceedings conference paper supplement (https://openaccess.thecvf.com/content/cvpr_2016/html/Dar_Temporal_Epipolar_Regions_2016_CVPR_paper.html)
Supplement: Supplementary file 1 [file Dar_Temporal_Epipolar_Regions_2016_CVPR_supplemental.zip › Code/Main_App/calcEpiLine.m]

function line = calcEpiLine(point,F)
% line = calcEpiLine(point,F)
%
% Author: Mor Dar
% Last Change: April 4, 2016
%
% This function recieves a point and a fundamental matrix and calculates
% the epipolar line.

line.epiline = F*point;
line.epiline = line.epiline./line.epiline(end);
line.epiline = line.epiline';

line.slope = -(line.epiline(1)/line.epiline(2));
line.yintercept = -(1/line.epiline(2));
