# Supplementary material
Source: ML conference proceedings conference paper supplement (https://openaccess.thecvf.com/content/cvpr_2016/html/Dar_Temporal_Epipolar_Regions_2016_CVPR_paper.html)
Supplement: Supplementary file 1 [file Dar_Temporal_Epipolar_Regions_2016_CVPR_supplemental.zip › Code/README.txt]

Temporal Epipolar Regions - Supplementary Materials

Sample Code 

The MATLAB code supplied allows for the building of TERs given a set of images,
the temporal order of image captures, fundamental matrices, and a small set of
corresponding points.  

In order to simplify the running of this code as much as possible, we include
a function which reads in and allows the user to set the temporal order of the 
images manually (loadAndOrderImFromDir.m).  This function outputs a structure 
which can be read by the main runTERs.m function.  

Additionally, if runTERs is run without first assigning the correspondences, a
window will open allowing the user to manually select the initial set of 
correspondences.  

Further details can be found in the comments of runTERs.m
