# Supplementary material
Source: ML conference proceedings conference paper supplement (https://openaccess.thecvf.com/content/cvpr_2016/html/Dar_Temporal_Epipolar_Regions_2016_CVPR_paper.html)
Supplement: Supplementary file 1 [file Dar_Temporal_Epipolar_Regions_2016_CVPR_supplemental.zip › README.txt]

Please find further proofs as well as statistical results presented in the 
SupplementaryMaterial.pdf file.  
Sample MATLAB code which may be used to build TERs is provided in the Code folder.
Examples of matching and results can be found on YouTube at https://youtu.be/viH0jlL5gMA
  
