# Supplementary material
Source: ML conference proceedings conference paper supplement (https://openaccess.thecvf.com/content/cvpr_2016/html/Dar_Temporal_Epipolar_Regions_2016_CVPR_paper.html)
Supplement: Supplementary file 1 [file Dar_Temporal_Epipolar_Regions_2016_CVPR_supplemental.zip › SupplementaryMaterial.pdf]

# Temporal Epipolar Regions Supplementary Materials

Mor Dar and Yael Moses  
Efi Arazi School of Computer Science  
The Interdisciplinary Center, Herzliya 46150, Israel  
mor.dar@post.idc.ac.il and yael@idc.ac.il

The following supplementary materials are split into two sections. In the first section we complete the proofs described in the main paper. The second section provides additional details relating to our experiments. In addition, we provide demonstrations of matching using TERs in the attached movie file.

## 1. Validity of TERs

In this section we formally define each TER type, and prove the valid orders for each. For each TER type, we present and prove the ordering of critical lines, and a single valid order in one of the sections. Once we have the order of critical lines and the valid order we can use observations **A1-A2** in order to find the remaining valid orders. As such, we find the 6 valid orders out of a possible 12 for each region. Note that the proofs below are all case based. To do so, we first parametrize the epipolar lines.

### 1.1. Parameterization

Without loss of generality, we set the coordinate system such that  $\ell_k$  is parallel to the  $x$ -axis, at  $y_k < 0$ . The intersection of  $\ell_i$  and  $\ell_k$  is at the origin, that is  $\gamma_{ij} = (0, 0)$ . As such,  $\ell_i$  and  $\ell_j$  are parametrized by  $y = m_i x$  and  $y = m_j x$ , respectively. Therefore,  $\gamma_{ik} = (\frac{b_k}{m_i}, b_k)$  and  $\gamma_{jk} = (\frac{b_k}{m_j}, b_k)$ . Finally for  $y > 0$ ,  $\ell_j$  is left of  $\ell_i$ , that is  $\frac{y}{m_j} < \frac{y}{m_i}$ . See Figs. 8-12.

Given a point  $\alpha_u = (x_u, y_u)$ , the critical lines are defined as follows:

$$c_i : y = m_i x + b_i$$

$$c_j : y = m_j x + b_j$$

$$c_k : y = y_u$$

$$c_{ij} : y = m_{ij} x, \text{ where } m_{ij} = \left( \frac{y_u}{x_u} \right)$$

$$c_{ik} : y = m_{ik} x + b_{ik}, \text{ where } m_{ik} = \left( \frac{\frac{y_k - y_u}{m_i} - x_u}{\frac{y_k}{m_i} - x_u} \right)$$

$$c_{jk} : y = m_{jk} x + b_{jk}, \text{ where } m_{jk} = \left( \frac{\frac{y_k - y_u}{m_j} - x_u}{\frac{y_k}{m_j} - x_u} \right)$$

To find the order of critical lines, we calculate the intersection of each critical line with the  $x$ -axis, given by the set  $\beta = \{\beta_i, \beta_j, \beta_{ij}, \beta_{ik}, \beta_{jk}\}$ :

$$c_i : \beta_i = x_u - \frac{y_u}{m_i}$$

$$c_j : \beta_j = x_u - \frac{y_u}{m_j}$$

$$c_k : \text{Parallel to } x\text{-axis}$$

$$c_{ij} : \beta_{ij} = 0$$

$$c_{ik} : \beta_{ik} = \frac{(x_u - \frac{y_u}{m_i})y_k}{(y_k - y_u)}$$

$$c_{jk} : \beta_{jk} = \frac{(x_u - \frac{y_u}{m_j})y_k}{(y_k - y_u)}$$

In regions  $R3$ ,  $R4$ , and  $R5$ , we need to consider the lines parallel to the epipolar lines (see Fig. 3). With that in mind, we also define the following:

$$\begin{aligned} \gamma_{ik} &= \left( \frac{y_k}{m_i}, y_k \right) \\ \hat{\ell}_j &= m_j x + \left( 1 - \frac{m_j}{m_i} \right) y_k \\ \hat{\gamma}_{jk} &= \left( \frac{1}{m_i} - \frac{1}{m_j} \right) y_k \end{aligned}$$

Note that  $\alpha_u$  is to the right of  $\ell_i$  if  $x_u > \frac{y_u}{m_i}$ , otherwise  $\alpha_u$  is the left of  $\ell_i$ . Similarly,  $\alpha_u$  is to the right of  $\ell_j$  if  $x_u > \frac{y_u}{m_j}$ . Finally,  $\alpha_u$  is to the right of  $\hat{\ell}_j$  if  $x_u > \frac{y_u}{m_j} - \left( \frac{1}{m_i} - \frac{1}{m_j} \right) y_k$ .

### 1.2. The $\beta$ ordering conditions

We next present the conditions that define the ordering of the set  $\beta$  along the  $x$ -axis. Since  $\beta$  depends on the location of  $\alpha_u = (x_u, y_u)$  with respect to each of the lines. These conditions can be easily verified visually (using Figs. 8-12) or algebraically using the definitions for  $\beta$  and the line given above.

1.  $\beta_i < \beta_j$

This is true given our setup as for  $y > 0$ ,  $\frac{y}{m_j} < \frac{y}{m_i}$ .

2.  $\beta_i > 0$ , that is,  $x_u - \frac{y_u}{m_i} > 0$  iff  
 $x_u > \frac{y_u}{m_i}$  ( $x_u$  is right of  $\ell_i$ )

3.  $\beta_j > 0$ , that is,  $x_u - \frac{y_u}{m_j} > 0$  iff  
 $x_u > \frac{y_u}{m_j}$  ( $x_u$  is right of  $\ell_j$ )

4.  $\beta_{ik} > 0$ , that is,  $\frac{(x_u - \frac{y_u}{m_i})y_k}{(y_k - y_u)} > 0$

iff one of these cases holds:

(i)  $x_u > \frac{y_u}{m_i}$  ( $x_u$  is right of  $\ell_i$ ) and  $y_u > y_k$

(ii)  $x_u < \frac{y_u}{m_i}$  ( $x_u$  is left of  $\ell_i$ ) and  $y_k > y_u$ .

5.  $\beta_{jk} > 0$ , that is,  $\frac{(x_u - \frac{y_u}{m_j})y_k}{(y_k - y_u)} > 0$

iff one of these cases hold:

(i)  $x_u > \frac{y_u}{m_j}$  ( $x_u$  is right of  $\ell_j$ ) and  $y_u > y_k$

(ii)  $x_u < \frac{y_u}{m_j}$  ( $x_u$  is left of  $\ell_j$ ) and  $y_k > y_u$

6.  $\beta_{ik} > \beta_i$  that is,

$$\frac{(x_u - \frac{y_u}{m_i})y_k}{(y_k - y_u)} > (x_u - \frac{y_u}{m_i})$$

Through algebraic manipulations we get:

$$\frac{(x_u - \frac{y_u}{m_i})y_u}{(y_k - y_u)} > 0$$

iff one of these cases holds:

(i)  $y_k < y_u < 0$  and  $x_u > \frac{y_u}{m_i}$  ( $x_u$  is right of  $\ell_i$ )

(ii)  $y_u > 0$  and  $x_u < \frac{y_u}{m_i}$  ( $x_u$  is left of  $\ell_i$ )

(iii)  $y_k > y_u$  and  $x_u < \frac{y_u}{m_i}$  ( $x_u$  is left of  $\ell_i$ )

7.  $\beta_{jk} > \beta_j$  that is,

$$\frac{(x_u - \frac{y_u}{m_j})y_k}{(y_k - y_u)} > (x_u - \frac{y_u}{m_j})$$

Through algebraic manipulations we get:

$$\frac{(x_u - \frac{y_u}{m_j})y_u}{(y_k - y_u)} > 0$$

iff one of these cases holds:

(i)  $y_k < y_u < 0$  and  $x_u > \frac{y_u}{m_j}$  ( $x_u$  is right of  $\ell_j$ )

(ii)  $y_u > 0$  and  $x_u < \frac{y_u}{m_j}$  ( $x_u$  is left of  $\ell_j$ )

(iii)  $y_k > y_u$  and  $x_u < \frac{y_u}{m_j}$  ( $x_u$  is left of  $\ell_j$ )

8.  $\beta_j > \beta_{ik}$  that is:

$$x_u - \frac{y_u}{m_j} > \frac{(x_u - \frac{y_u}{m_i})y_k}{(y_k - y_u)}$$

Through algebraic manipulations we get that:

$$y_u \frac{\hat{\gamma}_{jk} - \beta_j}{(y_k - y_u)} > 0$$

iff one of these cases holds:

(i)  $y_k < y_u < 0$  and  $x_u < \frac{y_u}{m_j} - (\frac{1}{m_i} - \frac{1}{m_j})y_k$   
( $x_u$  is left of  $\hat{\ell}_j$ )

(ii)  $y_u > 0$  and  $x_u > \frac{y_u}{m_j} - (\frac{1}{m_i} - \frac{1}{m_j})y_k$   
( $x_u$  is right of  $\hat{\ell}_j$ )

(iii)  $y_u < y_k$  and  $x_u > \frac{y_u}{m_j} - (\frac{1}{m_i} - \frac{1}{m_j})y_k$   
( $x_u$  is right of  $\hat{\ell}_j$ )

9.  $\beta_{ik} < \beta_{jk}$ , that is:

$$\frac{(x_u - \frac{y_u}{m_i})y_k}{(y_k - y_u)} < \frac{(x_u - \frac{y_u}{m_j})y_k}{(y_k - y_u)}$$

Through algebraic manipulations we get that

$$\frac{y_u(-\hat{\gamma}_{jk})}{y_k - y_u} < 0$$

As  $\frac{y}{m_j} < \frac{y}{m_i}$  when  $y > 0$ ,  $\hat{\gamma}_{jk}$  must be negative, therefore this rule holds iff either of these cases hold:

(i)  $y_u < y_k$

(ii)  $y_u > 0$

### 1.3. Geometric Observations

In addition to the conditions on  $\beta$  order, we use two basic geometric observations to prove the order in which a line passing through a section crosses each epipolar line and  $\alpha_u$ .

1. Define the points  $p_{a1}$  and  $p_{a2}$  as two points on a line  $\ell_a$ . Consider the line  $\ell_b$  which intersects  $\ell_a$ , at  $\tilde{\ell}_a \times \tilde{\ell}_b$  (where  $\tilde{x}$  is the homogenous coordinate of  $x$ ). If  $p_{a1}$  and  $p_{a2}$  are on opposite sides of  $\ell_b$ , the intersection of the two lines must be between  $p_{a1}$  and  $p_{a2}$  along  $\ell_a$ .

2. Given a point  $p$  between two parallel lines  $\ell_a$  and  $\hat{\ell}_a$ . Let  $\ell_b$  be a line passing through  $p$  which is not parallel to  $\ell_a$ . The point  $p$  must be between  $\tilde{\ell}_a \times \tilde{\ell}_b$  and  $\tilde{\ell}_a \times \tilde{\ell}_b$ .

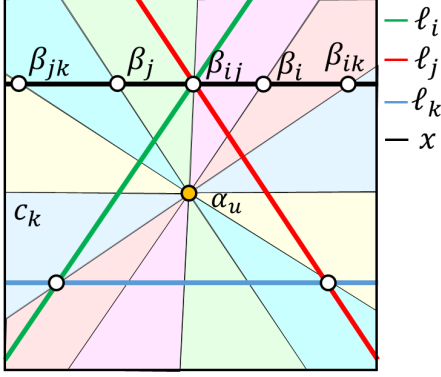

Figure 8: This figure shows the intersections of critical lines with the  $x$ -axis given  $\alpha_u$  in  $R1$ .

#### 1.4. Critical Line Orders for TERs

Here we formally define each region type and prove the order of critical lines for each region using the conditions on the order of  $\beta$ . The order of critical lines is defined by the order of the points in the set  $\beta$ . Note that as  $c_k$  is parallel to the  $x$ -axis and the order is cyclical,  $c_k$  can be either first or last in the order of critical lines for all regions. For reference, we provide in Table 2, the order of critical lines and valid orders for each of the 16 regions.

**Region R1:**  $R1$  is defined as the triangular region whose points are  $\gamma_{ij}$ ,  $\gamma_{ik}$ , and  $\gamma_{jk}$  (Fig. 3). Formally:

$$R_1 = \{(x_u, y_u) \mid y_k < y_u < 0 \text{ \& } \frac{y_u}{m_i} < x_u < \frac{y_u}{m_j}\}.$$

Critical line order for  $R1$ :  $c_{jk}, c_j, c_{ij}, c_i, c_{ik}, c_k$

Rules which prove order:

- (i)  $\beta_{jk} < \beta_j$ : Rule 7.
- (ii)  $\beta_j < \beta_{ij}$ : Rule 3.
- (iii)  $\beta_{ij} < \beta_i$ : Rule 2.
- (iv)  $\beta_i < \beta_{ik}$ : Rule 6.

**Region R2:**  $R2(i, j)$  is defined in the paper. It is the area comprised of  $\ell_i$  and  $\ell_j$  through which  $\ell_k$  does not pass. Formally:

$$R_2(i, j) = \{(x_u, y_u) \mid y_u > 0 > y_k \text{ \& } \frac{y_u}{m_j} < x_u < \frac{y_u}{m_i}\}.$$

Critical line order for  $R2(i, j)$ :  $c_i, c_{ik}, c_{ij}, c_{jk}, c_j, c_k$  Rules which prove order:

- (i)  $\beta_i < \beta_{ik}$ : Rule 6.
- (ii)  $\beta_{ik} < \beta_{ij}$ : Rule 4.

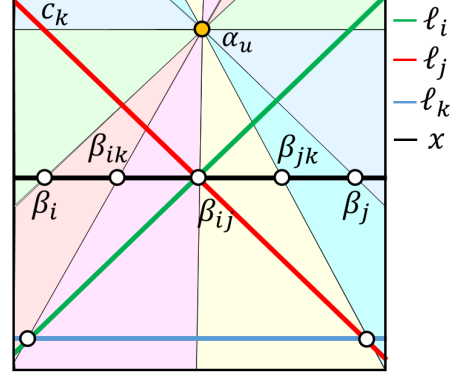

Figure 9: This figure shows the intersections of critical lines with the  $x$ -axis given  $\alpha_u$  in  $R2(i, j)$ .

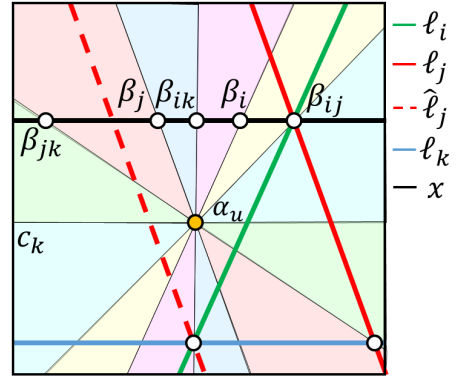

Figure 10: This figure shows the intersections of critical lines with the  $x$ -axis given  $\alpha_u$  in  $R3(i, \hat{j}, \hat{k})$ .

(iii)  $\beta_{ij} < \beta_{jk}$ : Rule 5.

(iv)  $\beta_{jk} < \beta_j$ : Rule 7.

**Region R3:**  $R3(i, \hat{j}, \hat{k})$  is defined by the triangle whose points are  $\gamma_{ij}$ ,  $\gamma_{ik}$ , and  $\hat{\gamma}_{jk} = (\hat{\ell}_j \times \hat{\ell}_k)$  (see Fig. 3). Note that the way in which we set up the lines,  $\hat{\ell}_k$  is the  $x$ -axis. Formally:

$$R_3(i, \hat{j}, \hat{k}) = \{(x_u, y_u) \mid 0 > y_u > y_k \text{ \& } \frac{y_u}{m_j} - (\frac{1}{m_i} - \frac{1}{m_j})y_k < x_u < \frac{y_u}{m_i}\}.$$

Critical line order for  $R3(i, \hat{j}, \hat{k})$ :  $c_{jk}, c_j, c_{ik}, c_i, c_{ij}, c_k$ .

Rules which prove order:

- (i)  $\beta_{jk} < \beta_j$ : Rule 7.
- (ii)  $\beta_j < \beta_{ik}$ : Rule 8.
- (iii)  $\beta_{ik} < \beta_i$ : Rule 6.
- (iv)  $\beta_i < \beta_{ij}$ : Rule 2.

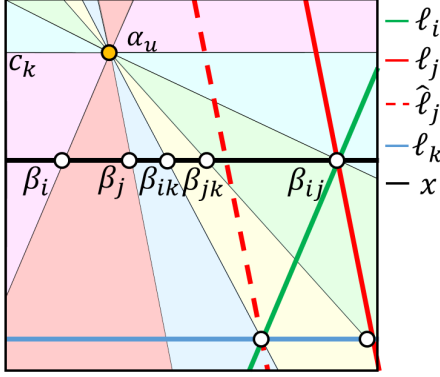

Figure 11: This figure shows the intersections of critical lines with the  $x$ -axis given  $\alpha_u$  in  $R4(\hat{j}, \hat{k})$ .

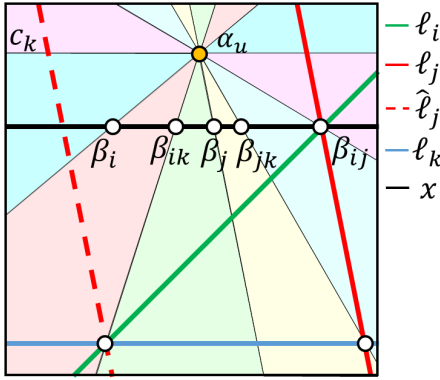

Figure 12: This figure shows the intersections of critical lines with the  $x$ -axis given  $\alpha_u$  in  $R5(\hat{j}, \hat{k})$ .

**Region R4** :  $R4(\hat{j}, \hat{k})$  is defined as the area comprised of  $\hat{\ell}_j$  and  $\hat{\ell}_k$  through which no other line passes (see Fig. 3). Formally:

$$R4(\hat{j}, \hat{k}) = \{(x_u, y_u) \mid y_u > 0 \text{ \& } x_u < \frac{y_u}{m_j} - (\frac{1}{m_i} - \frac{1}{m_j})y_k\}.$$

Critical line order for  $R4(\hat{j}, \hat{k})$ :  $c_i, c_j, c_{ik}, c_{jk}, c_{ij}, c_k$ .

Rules which prove order:

- (i)  $\beta_i < \beta_j$ : Rule 1.
- (ii)  $\beta_j < \beta_{ik}$  Rule 8.
- (iii)  $\beta_{ik} < \beta_{jk}$ : Rule 9.
- (iv)  $\beta_{jk} < \beta_{ij}$ : Rule 5.

**Region R5**:  $R5(\hat{j}, \hat{k})$  is defined as the open area bordered by  $\ell_j$ ,  $\hat{\ell}_j$ , and  $\hat{\ell}_k$  through which no other line passes (see Fig. 3). Formally:

$$R5(\hat{j}, \hat{k}) = \{(x_u, y_u) \mid y_u > 0 \text{ \& }$$

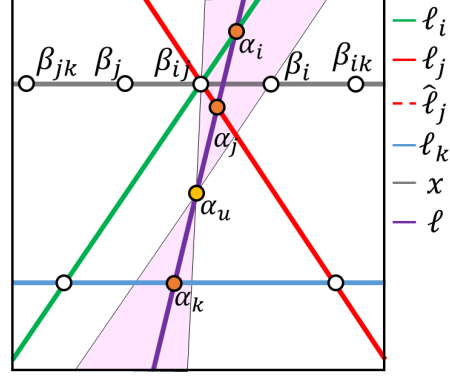

Figure 13: This is the same as Fig 8, only this time we highlight an  $\ell \in L(c_{ij}, c_i, \alpha_u)$  and its intersections.

$$\frac{y_u}{m_j} - (\frac{1}{m_i} - \frac{1}{m_j})y_k < x_u < \frac{y_u}{m_j} \}.$$

Critical line order for  $R5(\hat{j}, \hat{k})$ :  $c_i, c_{ik}, c_j, c_{jk}, c_{ij}, c_k$ .

- (i)  $\beta_i < \beta_{ik}$ : Rule 6.
- (ii)  $\beta_{ik} < \beta_j$ : Rule 8.
- (iii)  $\beta_j < \beta_{jk}$ : Rule 7.
- (iv)  $\beta_{jk} < \beta_{ij}$ : Rule 5.

Note that all of the above orders are independent of the location of  $\alpha_u$  in each region.

## 1.5. Valid Orders for TERs

We now prove the valid orders for each region. To that end, we make use of the basic geometric observations detailed above and the region definitions given. The following proofs can be easily visually verified using the corresponding Figs. 13-17, but are given here for completeness. We define  $\alpha_i$  to be the intersection of a line  $\ell$  which passes through  $\alpha_u$  and the epipolar line  $\ell_i$ , that is,  $\tilde{\alpha}_i = \tilde{\ell} \times \tilde{\ell}_i$  where  $\tilde{\alpha}_u \tilde{\ell} = 0$ . The points  $\alpha_j$  and  $\alpha_k$  are defined similarly.

### 1.5.1 Region R1 (Fig. 13)

Let  $L(c_{ij}, c_i, \alpha_u)$  be the set of lines passing through  $\alpha_u$  in the section defined by the two neighboring critical lines  $c_{ij}$  and  $c_i$ . Consider an  $\ell \in L(c_{ij}, c_i, \alpha_u)$  for  $\alpha_u \in R1$ , and define  $\beta_\ell$  to be the  $x$ -intercept of  $\ell$ .

**Claim 1:** The valid order given by  $L(c_{ij}, c_i, \alpha_u)$  when  $\alpha_u \in R1$  is  $(u, i, j, k)$  as given by the intersections of  $\ell$  with  $\alpha_u$  and each of the epipolar lines.

#### Proof of Claim 1:

1. As  $\ell_k$  is parallel to the  $x$ -axis and  $y_k < y_u < 0$ , geometric observation (2) dictates that  $\alpha_u$  must be between  $\alpha_k$  and  $\beta_\ell$ .

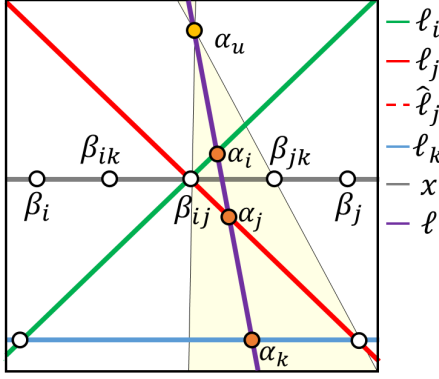

Figure 14: This is the same as Fig 9, only this time we highlight an  $\ell \in L(c_{ij}, c_{jk}, \alpha_u)$  and its intersections.

2. By definition of this section,  $\beta_\ell > 0$  (as  $\beta_{ij} = 0$ ), and therefore,  $\beta_\ell$  is right of  $\ell_j$ . Furthermore, as the definition of  $R1$  requires that any points within it be left of  $\ell_j$  (as  $x_u < \frac{y_u}{m_j}$ ), geometric observation (1) dictates that  $\alpha_j$  be between  $\alpha_u$  and  $\beta_\ell$ .
3.  $\beta_\ell$  is defined to be between  $\beta_{ij}$ , through which  $\ell_i$  passes, and  $\beta_i$ , through which  $\ell_i$  passes. Note that  $c_i$  also passes through  $\alpha_u$  and is parallel to  $\ell_i$ . As such, geometric observation (2) dictates that  $\beta_\ell$  must be between  $\alpha_u$  and  $\alpha_i$ .

As such, the order of intersections along  $\ell$  must be  $\alpha_k < \alpha_u < \alpha_j < \alpha_i$  (up to direction).

### 1.5.2 Region $R2(i, j)$ (Fig. 14)

Let  $L(c_{ij}, c_{jk}, \alpha_u)$  be the set of lines passing through  $\alpha_u$  in the section defined by the two neighboring critical lines  $c_{ij}$  and  $c_{jk}$ . Consider an  $\ell \in L(c_{ij}, c_{jk}, \alpha_u)$  for  $\alpha_u \in R2(i, j)$ . As above, define  $\beta_\ell$  to be the  $x$ -intercept of  $\ell$ .

**Claim 2:** The valid order given by  $L(c_{ij}, c_{jk}, \alpha_u)$  when  $\alpha_u \in R2(i, j)$  is  $(u, i, j, k)$  as defined by the intersections of  $\ell$ .

#### Proof of Claim 2:

1. By definition of the section,  $\beta_\ell > 0$  and therefore must be to the right of  $\ell_i$  (as  $\ell_i$  intersects the origin). Furthermore, the definition of  $R2(i, j)$  dictates that  $\alpha_u$  be left of  $\ell_i$  ( $x_u < \frac{y_u}{m_i}$ ). Using geometric observation (1), we have that  $\alpha_i$  is between  $\alpha_u$  and  $\beta_\ell$ .
2. Note that  $c_{jk}$  is defined as the line connecting  $\alpha_u$  to the intersection of  $\ell_k$  and  $\ell_j$ . As such,  $\alpha_k$  must be left of  $\ell_j$ . Furthermore, as  $\beta_\ell > 0$ , it must also be to the right of  $\ell_j$ . Therefore, using geometric observation (1), we have that  $\alpha_j$  must be between  $\alpha_k$  and  $\beta_\ell$ .

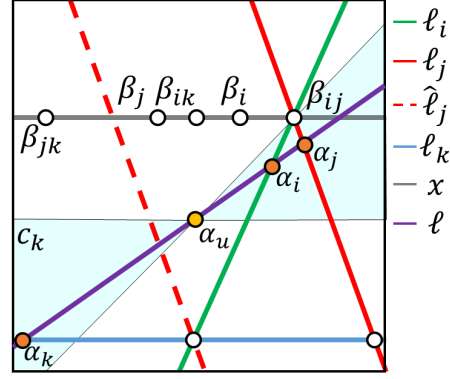

Figure 15: This is the same as Fig 10, only this time we highlight an  $\ell$  connecting  $\alpha_u$  and  $\beta_\ell$  and its intersections.

As  $y_u > 0$ ,  $y_k < 0$  and  $\beta_\ell$  is at the  $x$ -intercept, the order of intersections along  $\ell$  must be  $\alpha_u < \alpha_i < \alpha_j < \alpha_k$  (up to direction).

### 1.5.3 Region $R3(i, \hat{j}, \hat{k})$ (Fig. 15)

Consider an  $\ell$  connecting  $\alpha_u$  and  $\beta_\ell = (x_\ell, 0)$  where  $x_\ell > 0$ . That is,  $\ell$  passes through the section bordered by  $c_{ij}$  and  $c_k$ .

**Claim 3:** The valid order given by this section is  $(k, u, i, j)$  as defined by the intersections of  $\ell$ .

#### Proof of Claim 3:

1. As  $R3(i, \hat{j}, \hat{k})$  defines  $x_u < \frac{y_u}{m_i}$  ( $\alpha_u$  left of  $\ell_i$ ) and  $\beta_\ell > 0$  ( $\beta_\ell$  right of  $\ell_i$ ), geometric observation (1) dictates that  $\alpha_i$  is between  $\alpha_u$  and  $\beta_\ell$ .
2. Using the definition of  $R3(i, \hat{j}, \hat{k})$ , we also have that  $0 > y_u > y_k$ , so  $\alpha_u$  is between  $\beta_\ell$  and  $\alpha_k$ .
3. As the definition of our lines dictates that  $\ell_j$  is left of  $\ell_i$  when  $y > 0$ , and the two lines intersect at the origin, it follows that  $\ell_j$  is right of  $\ell_i$  when  $y < 0$ . As such  $\alpha_j$  is between  $\alpha_i$  and  $\beta_\ell$  along  $\ell$ .

We therefore have that the order of intersections along  $\ell$  must be  $\alpha_k < \alpha_u < \alpha_i < \alpha_j$  (up to direction).

### 1.5.4 Region $R4(\hat{j}, \hat{k})$ (Fig. 16)

Consider an  $\ell$  connecting  $\alpha_u$  and  $\beta_\ell = (x_\ell, 0)$  where  $x_\ell > 0$ . That is,  $\ell$  passes through the section bordered by  $c_{ij}$  and  $c_k$ .

**Claim 4:** The valid order given by this section is  $(u, j, i, k)$  as defined by the intersections of  $\ell$ .

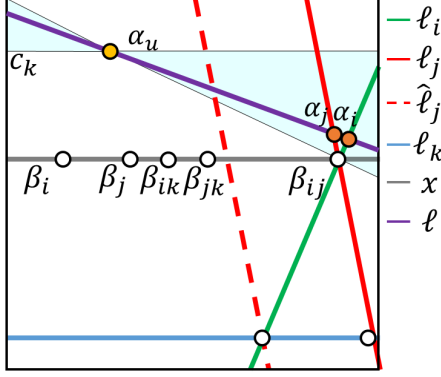

Figure 16: This is the same as Fig 11, only this time we highlight an  $\ell$  connecting  $\alpha_u$  and  $\beta_\ell$  and its intersections. Note that due to space restrictions, we cannot clearly show all the intersections of  $\ell$ . However it is clear that  $\alpha_k$  is intersected to the right of the figure.

#### Proof of Claim 4:

1. As  $R4(\hat{j}, \hat{k})$  defines that  $\alpha_u > 0$  and  $y_k < 0$ , geometric observation (1) dictates that  $\beta_\ell$  is between  $\alpha_u$  and  $\alpha_k$ .
2. Note that  $\hat{\ell}_j$  is parallel to  $\ell_j$  and intersects  $\gamma_{ik}$  (the intersection point of  $\ell_i$  and  $\ell_k$ ). As  $y_k < 0$  and, as described above, when  $y < 0$   $\ell_i$  is left of  $\ell_j$ ,  $\gamma_{ik}$  is left of  $\ell_j$ . Therefore,  $\hat{\ell}_j$  is left of  $\ell_j$ . As  $R4(\hat{j}, \hat{k})$  defines that  $\alpha_u$  is left of  $\hat{\ell}_j$  ( $x_u < \frac{y_u}{m_j} - (\frac{1}{m_i} - \frac{1}{m_j})y_k$ ),  $\alpha_u$  must also be left of  $\ell_j$ . As  $\alpha_u$  is left of  $\ell_j$  and  $\beta_\ell$  is right of  $\ell_j$  (as  $\beta_\ell > 0$ ), geometric observation (1) dictates that  $\alpha_j$  must be between  $\alpha_u$  and  $\beta_\ell$ .
3. As  $\ell_j$  is left of  $\ell_i$  for  $y > 0$  and  $\alpha_u$  is left of  $\ell_j$  (as above),  $\alpha_u$  must also be left of  $\ell_i$ . Therefore, as  $\beta_\ell$  is right of  $\ell_i$  (as  $\beta_\ell > 0$ ), geometric observation (1) is used to determine that  $\alpha_i$  is between  $\alpha_u$  and  $\beta_\ell$ .
4. Given (2) and (3), we know that  $\alpha_i$  and  $\alpha_j$  must be above the  $x$ -axis. Therefore, as we know that  $\ell_j$  is left of  $\ell_i$  above  $y > 0$ , we know that  $\alpha_i$  is between  $\alpha_j$  and  $\beta_\ell$ .

We therefore have that the order of intersections along  $\ell$  must be  $\alpha_u < \alpha_j < \alpha_i < \alpha_k$  (up to direction).

#### 1.5.5 Region $R5(\hat{j}, \hat{j}, \hat{k})$ (Fig. 17)

Consider an  $\ell$  connecting  $\alpha_u$  and  $\beta_\ell = (x_\ell, 0)$  where  $x_\ell > 0$ . That is,  $\ell$  passes through the section bordered by  $c_{ij}$  and  $c_k$ .

**Claim 5:** The valid order given by this section is  $(u, j, i, k)$  as defined by the intersections of  $\ell$ .

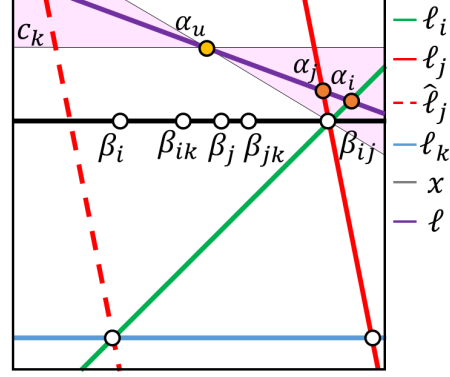

Figure 17: This is the same as Fig 12, only this time we highlight an  $\ell$  connecting  $\alpha_u$  and  $\beta_\ell$  and its intersections. Note that due to space restrictions, we cannot clearly show all the intersections of  $\ell$ . However it is clear that  $\alpha_k$  is intersected to the right of the figure.

#### Proof of Claim 5:

1. As  $R5(\hat{j}, \hat{j}, \hat{k})$  defines that  $\alpha_u > 0$  and  $y_k < 0$ , geometric observation (1) dictates that  $\beta_\ell$  is between  $\alpha_u$  and  $\alpha_k$ .
2. As  $R5(\hat{j}, \hat{j}, \hat{k})$  defines that  $x_u < \frac{y_u}{m_j}$  ( $\alpha_u$  is left of  $\ell_j$ ) and  $\beta_\ell$  is right of  $\ell_j$  (as  $\beta_\ell > 0$ ), geometric observation (1) is used to determine that  $\alpha_j$  is between  $\alpha_u$  and  $\beta_\ell$ .
3. As our lines are set up in such a way that  $\ell_j$  is left of  $\ell_i$  for  $y > 0$  and  $\alpha_u$  is left of  $\ell_j$  (as above),  $\alpha_u$  must also be left of  $\ell_i$ . Therefore, as  $\beta_\ell$  is right of  $\ell_i$  (as  $\beta_\ell > 0$ ), geometric observation (1) is used to determine that  $\alpha_i$  is between  $\alpha_u$  and  $\beta_\ell$ .
4. Given (2) and (3), we know that  $\alpha_i$  and  $\alpha_j$  must be above the  $x$ -axis. Therefore, as we know that  $\ell_j$  is left of  $\ell_i$  above  $y > 0$ , we know that  $\alpha_i$  is between  $\alpha_j$  and  $\beta_\ell$ .

As such, the order of intersections along  $\ell$  must be  $\alpha_u < \alpha_j < \alpha_i < \alpha_k$  (up to direction). Note that the order we showed to be valid for this region was also shown to make  $R4(\hat{j}, \hat{k})$  valid. However, as the order of critical lines between the two regions is different, not all orders will be shared.

Now that we have the order of the critical lines, and one valid order for each region, we can use observations **A1-A2** from Sec. 3.3, in order to find the remainder of the valid orders for each region (see Table 2).

In this section, we proved: (i) the critical line order using any  $\alpha_u$  within each region and (ii) the valid orders for each region given any  $\alpha_u$  in that region. Given these two claims, it follows that each point within a region has the same 6 valid orders.

| #  | Region                    | Critical Line Order                     | Valid Orders                                                                         |
|----|---------------------------|-----------------------------------------|--------------------------------------------------------------------------------------|
| 1  | $R1$                      | $c_{jk}, c_j, c_{ij}, c_i, c_{ik}, c_k$ | $(i, u, j, k), (i, j, u, k), (i, u, k, j), (i, k, u, j), (k, i, u, j), (j, i, u, k)$ |
| 2  | $R2(i, j)$                | $c_i, c_{ik}, c_{ij}, c_{jk}, c_j, c_k$ | $(u, j, k, i), (u, j, i, k), (u, i, j, k), (u, i, k, j), (j, u, i, k), (i, u, j, k)$ |
| 3  | $R2(i, k)$                | $c_j, c_i, c_{ij}, c_{ik}, c_{jk}, c_k$ | $(u, k, j, i), (u, k, i, j), (u, i, k, j), (u, i, j, k), (k, u, i, j), (i, u, k, j)$ |
| 4  | $R2(j, k)$                | $c_{ik}, c_{jk}, c_{ij}, c_j, c_i, c_k$ | $(u, k, i, j), (u, k, j, i), (u, j, k, i), (u, j, i, k), (k, u, j, i), (j, u, k, i)$ |
| 5  | $R3(i, \hat{j}, \hat{k})$ | $c_{jk}, c_j, c_{ik}, c_i, c_{ij}, c_k$ | $(u, i, j, k), (u, i, k, j), (j, u, k, i), (k, u, j, i), (j, u, i, k), (k, u, i, j)$ |
| 6  | $R3(j, \hat{i}, \hat{k})$ | $c_{ij}, c_j, c_{jk}, c_i, c_{ik}, c_k$ | $(u, j, i, k), (u, j, k, i), (i, u, k, j), (k, u, i, j), (i, u, j, k), (k, u, j, i)$ |
| 7  | $R3(k, \hat{i}, \hat{j})$ | $c_{ik}, c_j, c_{ij}, c_i, c_{jk}, c_k$ | $(u, k, i, j), (u, k, j, i), (i, u, j, k), (j, u, i, k), (i, u, k, j), (j, u, k, i)$ |
| 8  | $R4(j, \hat{k})$          | $c_i, c_j, c_{ik}, c_{jk}, c_{ij}, c_k$ | $(u, i, j, k), (u, i, k, j), (u, j, i, k), (u, k, i, j), (i, j, u, k), (i, k, u, j)$ |
| 9  | $R4(i, \hat{k})$          | $c_{ij}, c_{ik}, c_{jk}, c_i, c_j, c_k$ | $(u, j, i, k), (u, j, k, i), (u, i, j, k), (u, k, j, i), (j, i, u, k), (j, k, u, i)$ |
| 10 | $R4(i, \hat{j})$          | $c_j, c_{ik}, c_{ij}, c_{jk}, c_i, c_k$ | $(u, k, i, j), (u, k, j, i), (u, i, k, j), (u, j, k, i), (k, i, u, j), (k, j, u, i)$ |
| 11 | $R5(j, \hat{j}, \hat{k})$ | $c_i, c_{ik}, c_j, c_{jk}, c_{ij}, c_k$ | $(u, i, j, k), (u, i, k, j), (u, j, i, k), (j, u, k, i), (k, u, j, i), (k, i, u, j)$ |
| 12 | $R5(k, \hat{k}, \hat{j})$ | $c_{jk}, c_{ij}, c_j, c_i, c_{ij}, c_k$ | $(u, i, k, j), (u, i, j, k), (u, k, i, j), (k, u, j, i), (j, u, k, i), (j, i, u, k)$ |
| 13 | $R5(i, \hat{i}, \hat{k})$ | $c_{ij}, c_{ik}, c_i, c_{jk}, c_j, c_k$ | $(u, j, i, k), (u, j, k, i), (u, i, j, k), (i, u, k, j), (k, u, i, j), (k, j, u, i)$ |
| 14 | $R5(k, \hat{k}, \hat{i})$ | $c_{ij}, c_j, c_i, c_{jk}, c_{ik}, c_k$ | $(u, j, k, i), (u, j, i, k), (u, k, j, i), (k, u, i, j), (i, u, k, j), (i, j, u, k)$ |
| 15 | $R5(j, \hat{j}, \hat{i})$ | $c_{ik}, c_j, c_{ij}, c_{ik}, c_i, c_k$ | $(u, k, j, i), (u, k, i, j), (u, j, k, i), (j, u, i, k), (i, u, j, k), (i, k, u, j)$ |
| 16 | $R5(i, \hat{i}, \hat{j})$ | $c_j, c_{ik}, c_{ij}, c_i, c_{jk}, c_k$ | $(u, k, i, j), (u, k, j, i), (u, i, k, j), (i, u, j, k), (j, u, i, k), (j, k, u, i)$ |

Table 2

## 2. Experimental Results

Here we present a summary of experiments from all datasets split into two tables. Table 3 shows the results of experiments in which three initial correspondences were given (Test 5, Sec. 5.2). Table 4 shows results of experiments in which only one point was given and initial correspondence was selected using nearest neighbors (Test 6, Sec. 5.2). Table 5 shows results relating to incorrect initializations and dead ends (Test 6, Sec. 5.2).

We present the results in a similar manner in Tables 3,4. Each dataset corresponds to a location, given by the letters a-i, and different image sets taken at each location at different times, given by the numbers 1-5. The number of images and the number of points to be matched vary between datasets. We tested our method a number of times on each dataset, each with a different combination of initial points summarized in the # combinations column. For each dataset we also present the percent of the tests in which dead ends were encountered. Note that, as described in test 5, Sec. 5.2, when encountering dead ends, we deduce that we do no better than matching without TERs. As such, the rest of the columns present results from the remainder of the data, which has no dead ends. We present the percent correct matching with and without the use of TERs over all data in each dataset. As we searched for matches for different points per dataset, improvements in matching may not have been consistent from point to point. In the "% Points Improved" column we present the percentage of the points which had improved matching when using TERs. We also

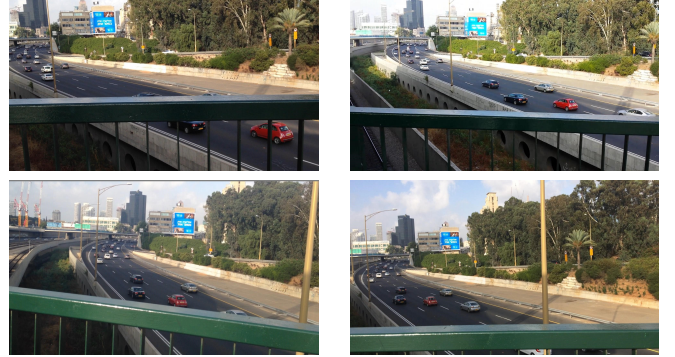

Figure 18: Four sample images from dataset a1.

present the difference in the percent of correct matching between matching with and without TERs. We present the results only for the points for which using TERs changed the matching results.

We present here a number of images from each location as reference (Figs. 18- 26). Additional examples are shown in the video clip provided at: <https://youtu.be/viH0jlL5gMA>.

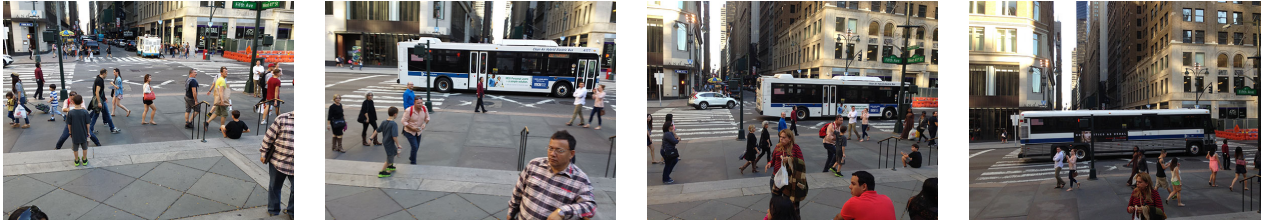

Figure 21: Four sample images from dataset d1.

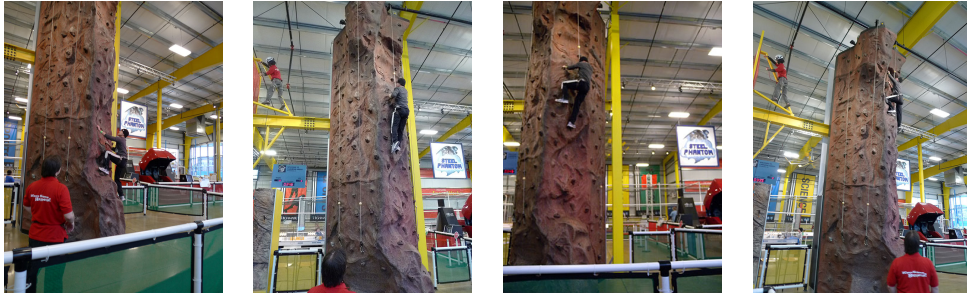

Figure 22: Four sample images from dataset e1.

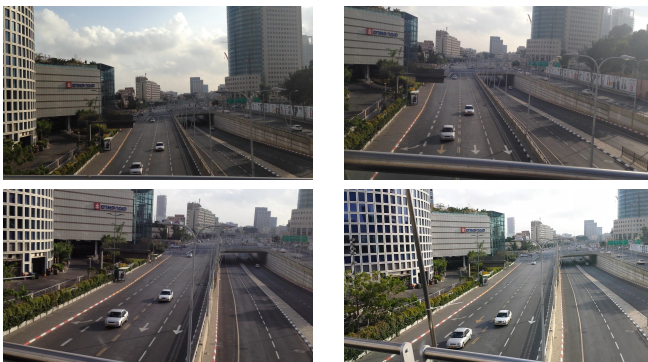

Figure 19: Four sample images from dataset b2.

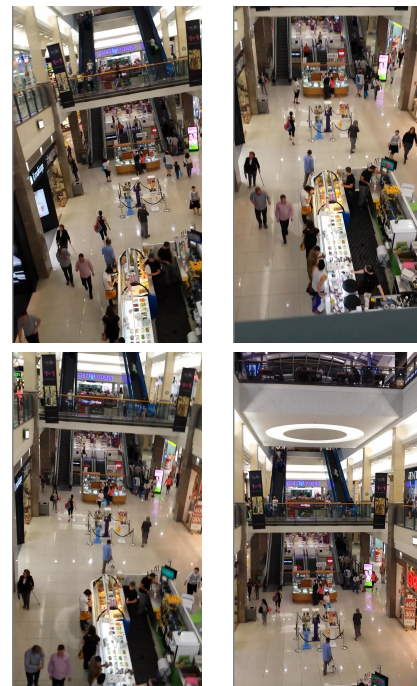

Figure 20: Four sample images from dataset c5.

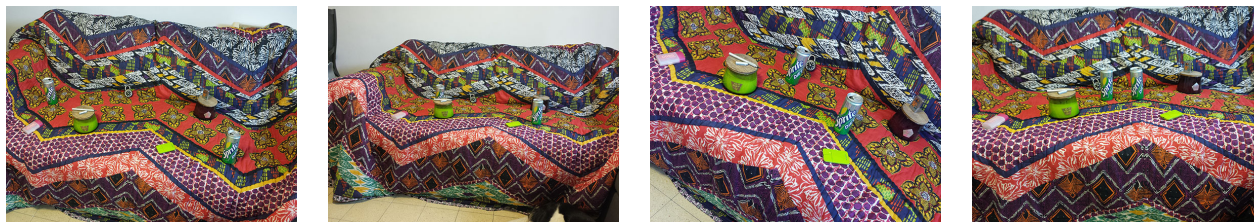

Figure 23: Four sample images from dataset f1.

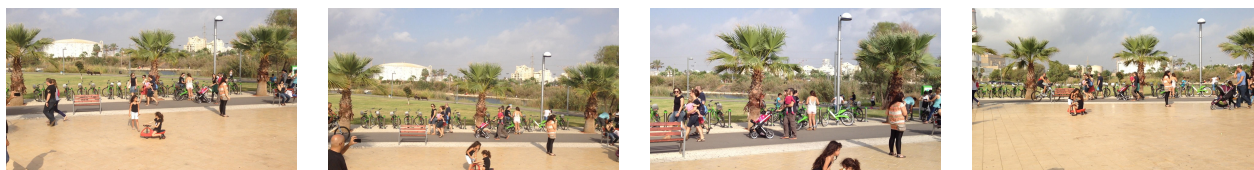

Figure 24: Four sample images from dataset g1.

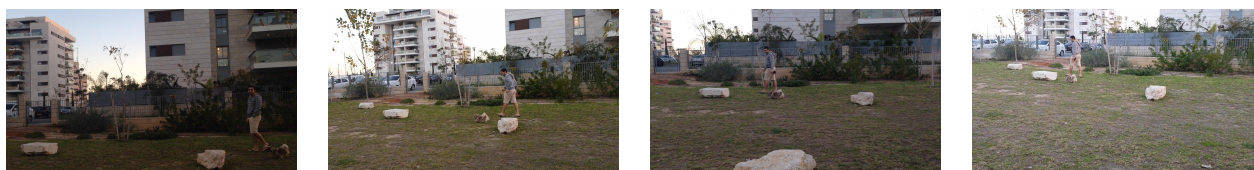

Figure 25: Four sample images from dataset h1.

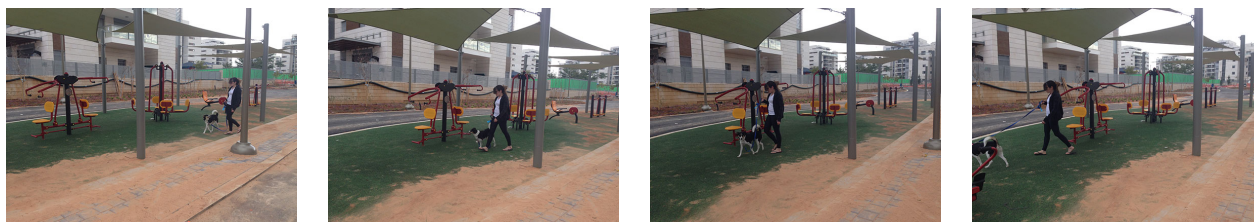

Figure 26: Four sample images from location i.

| Dataset | # Images | # Points | # Combinations | % Dead End | % Matches<br>Without TERs | % Matches<br>With TER | % Points<br>Improved | Average<br>Diff. % |
|---------|----------|----------|----------------|------------|---------------------------|-----------------------|----------------------|--------------------|
| a1      | 5        | 4        | 40             | 0          | 22.5                      | 22.5                  | 0                    |                    |
| a2      | 5        | 5        | 50             | 0.4        | 13.6                      | 15.3                  | 60                   | 4.6                |
| a3      | 6        | 9        | 162            | 2.0        | 7.7                       | 8.2                   | 33                   | 4.5                |
| a4      | 10       | 2        | 185            | 31.9       | 19.9                      | 19.9                  | 0                    |                    |
| b1      | 7        | 1        | 35             | 22.9       | 29.6                      | 45.4                  | 100                  | 15.7               |
| b2      | 6        | 5        | 100            | 0.4        | 15.8                      | 16.0                  | 20                   | 5.0                |
| c1      | 6        | 3        | 60             | 9.4        | 20.6                      | 26.5                  | 100                  | 5.9                |
| c2      | 7        | 4        | 137            | 9.1        | 8.9                       | 9.9                   | 75                   | 1.8                |
| c3      | 6        | 4        | 80             | 0.9        | 14.0                      | 15.2                  | 100                  | 1.2                |
| c4      | 6        | 2        | 40             | 1.3        | 23.5                      | 24.3                  | 100                  | 0.8                |
| c5      | 8        | 5        | 269            | 3.7        | 12.5                      | 13.8                  | 100                  | 1.3                |
| d1      | 6        | 1        | 18             | 50.0       | 33.3                      | 48.2                  | 100                  | 14.8               |
| e1      | 6        | 4        | 80             | 4.1        | 4.8                       | 6.7                   | 25                   | 29.6               |
| f1      | 7        | 6        | 209            | 2.8        | 10.6                      | 12.2                  | 83                   | 2.3                |
| g1      | 8        | 4        | 203            | 21.3       | 11.7                      | 12.9                  | 75                   | 2.2                |
| h1      | 9        | 2        | 157            | 37.3       | 12.4                      | 22.6                  | 100                  | 10.3               |
| h2      | 6        | 4        | 74             | 5.4        | 10.8                      | 12.5                  | 50                   | 7.1                |
| i1      | 7        | 3        | 101            | 16.5       | 11.2                      | 11.9                  | 67                   | 1.5                |

Table 3: This table presents the results of test 5, in which three initial correspondences are given manually. See details regarding columns in Sec. 2 above.

| Dataset | # Images | # Points | # Combinations | % Dead End | % Matches<br>Without TERs | % Matches<br>With TER | % Points<br>Improved | Average<br>Diff. % |
|---------|----------|----------|----------------|------------|---------------------------|-----------------------|----------------------|--------------------|
| a1      | 5        | 4        | 20             | 2.5        | 7.3                       | 6.9                   | 25                   | -6.3               |
| a2      | 5        | 5        | 25             | 1.6        | 3.8                       | 3.6                   | 20                   | -5.0               |
| a3      | 6        | 9        | 52             | 4.3        | 2.9                       | 3.3                   | 22                   | 6.7                |
| a4      | 10       | 2        | 14             | 32.1       | 13.9                      | 13.9                  | 0                    |                    |
| b1      | 7        | 1        | 7              | 85.7       | 0                         | 16.7                  | 100                  | 16.7               |
| b2      | 6        | 5        | 30             | 4.0        | 6.7                       | 6.9                   | 20                   | 3.3                |
| c1      | 6        | 3        | 18             | 13.0       | 8.9                       | 11.1                  | 100                  | 2.2                |
| c2      | 7        | 4        | 24             | 20.8       | 0                         | 1.6                   | 25                   | 16.7               |
| c3      | 6        | 4        | 24             | 5.2        | 4.8                       | 4.8                   | 0                    |                    |
| c4      | 6        | 2        | 12             | 8.3        | 0                         | 0                     | 0                    |                    |
| c5      | 8        | 5        | 37             | 10.8       | 6.5                       | 6.7                   | 40                   | 3.3                |
| d1      | 6        | 1        | 6              | 66.7       | 10.0                      | 30.0                  | 100                  | 20.0               |
| e1      | 6        | 4        | 23             | 13.0       | 0.4                       | 0.7                   | 50                   | 1.2                |
| f1      | 7        | 6        | 42             | 7.9        | 5.3                       | 5.7                   | 67                   | 0.7                |
| g1      | 8        | 4        | 32             | 22.7       | 0                         | 0                     | 0                    |                    |
| h1      | 9        | 2        | 16             | 40.6       | 14.1                      | 35.2                  | 50                   | 37.5               |
| h2      | 6        | 4        | 24             | 12.5       | 3.9                       | 3.9                   | 0                    |                    |
| i1      | 7        | 3        | 21             | 17.5       | 4.3                       | 7.1                   | 33                   | 25.0               |

Table 4: This table presents the results of test 6, in which nearest neighbors to a single given point are used to select the three initial correspondences. See details regarding columns in Sec. 2 above.

| # Images | # Experiments With $S_q$ Errors | # Dead Ends | # Dead Ends Given $S_q$ Errors | % Dead Ends Given $S_q$ Errors |
|----------|---------------------------------|-------------|--------------------------------|--------------------------------|
| 5        | 19                              | 4           | 4                              | 21.05                          |
| 6        | 116                             | 73          | 59                             | 50.86                          |
| 7        | 60                              | 57          | 48                             | 80.00                          |
| 8        | 42                              | 49          | 34                             | 80.95                          |
| 9        | 29                              | 39          | 28                             | 96.55                          |
| 10       | 9                               | 9           | 9                              | 100.00                         |
| 12       | 19                              | 24          | 19                             | 100.00                         |

Table 5: This table presents data from test 6 relating to incorrect matches selected for the initial set. For datasets containing different number of images, we present the number of experiments in which the initial set  $S_q$  was initialized incorrectly, the overall number of dead ends, the number of dead ends in experiments which had errors in the initial set, and the percentage of the time in which dead ends were reached given errors in the initial set.
